1 Modeling HIV disease progression and transmission at population-level: The potential impact of  
2 modifying disease progression in HIV treatment programs

3  
4 \*Jennifer M. Ross<sup>1</sup>, MD, MPH, \*Roger Ying<sup>6</sup>, BS, Connie L. Celum<sup>1,2,3</sup>, MD, Jared M. Baeten<sup>1,2,3</sup>, MD, PhD,  
5 Jairam R. Lingappa<sup>1,2,4</sup>, MD, PhD, Katherine K. Thomas<sup>2</sup>, MS, Pamela M. Murnane<sup>2,3</sup>, PhD, Meighan Krows<sup>2</sup>,  
6 BA, Heidi van Rooyen<sup>7</sup>, PhD, James P Hughes<sup>5,8</sup>, PhD, and Ruanne Barnabas<sup>1,2,3,8</sup>, MD, DPhil

7  
8 Departments of <sup>1</sup>Medicine, <sup>2</sup>Global Health, <sup>3</sup>Epidemiology, <sup>4</sup>Pediatrics, <sup>5</sup>Biostatistics, University of  
9 Washington, Seattle, WA, USA; <sup>6</sup>Weill Cornell Medical College, Cornell University, New York, NY, USA;  
10 <sup>7</sup>Human Sciences Research Council, Durban, South Africa; <sup>8</sup>Vaccine and Infectious Diseases Division, Fred  
11 Hutchinson Cancer Research Center, Seattle, WA, USA

12 \*These authors contributed equally to the work.

13 **Word count:** 2942 **Tables:** 4 **Figures:** 2

14 **Abstract word count:** 332

15 **Correspondence to:**

16 Jennifer M. Ross

17 Division of Allergy and Infectious Disease

18 University of Washington

19 1959 NE Pacific St., Box 356423

20 Seattle, WA 98195

21 Phone: 206-685-4456

22 Fax: 206-616-3892

23 Email: [jross3@uw.edu](mailto:jross3@uw.edu)

24 **Abstract**

25 **Introduction:** Mathematical models of HIV transmission that incorporate the dynamics of disease  
26 progression can estimate the potential impact of adjunctive strategies to antiretroviral therapy (ART) for  
27 HIV treatment and prevention. Suppressive treatment of HIV-positive persons co-infected with herpes  
28 simplex virus-2 (HSV-2) with valacyclovir, a medication directed against HSV-2, can lower HIV viral load,  
29 but the impact of valacyclovir on population HIV transmission has not been estimated.

30 **Methods:** We applied data on CD4 and viral load progression in ART-naïve persons studied in two HIV  
31 clinical trials to a novel, discrete-time Markov model. We validated our disease progression estimates  
32 using data from a trial of home-based HIV counseling and testing in KwaZulu-Natal, South Africa. Finally,  
33 we applied our disease progression estimates to a dynamic transmission model estimating the impact of  
34 providing valacyclovir to ART-naïve individuals to reduce onward transmission of HIV in three scenarios of  
35 different ART and valacyclovir population coverage. We assumed that valacyclovir reduced HIV viral load  
36 by 1.23 log copies/ $\mu\text{L}$ , and that persons treated with valacyclovir initiated ART more rapidly when their  
37 CD4 fell below 500 due to improved retention in pre-ART care.

38 **Results:** The average duration of HIV infection following acute infection was 9.5 years. The duration of  
39 disease after acute infection and before reaching CD4 200 cells/ $\mu\text{L}$  was 2.53 years longer for females than  
40 males. Relative to a baseline of community HIV testing and counseling and ART initiation at CD4  $\leq$ 500  
41 cells/ $\mu\text{L}$ , valacyclovir with increased linkage to care resulted in 166,000 fewer HIV infections over ten  
42 years, with an incremental cost-effectiveness ratio (ICER) of \$4,696 per HIV infection averted. The Test  
43 and Treat scenario with 70% ART coverage and no valacyclovir resulted in 202,000 fewer HIV infections at  
44 an ICER of \$6,579.

45 **Conclusion:** Even when compared with initiation of valacyclovir, a safe drug that reduces HIV viral load,  
46 universal treatment for HIV is the optimal strategy for averting new infections and increasing public health  
47 benefit. Universal HIV treatment should be pursued by all countries to most effectively and efficiently  
48 reduce the HIV burden.

49 **Keywords:** HIV, valacyclovir, herpes simplex virus, disease progression, mathematical modeling, ART,  
50 HIV prevention

51

52

## 53 **Introduction<sup>1</sup>**

54           Dynamic HIV transmission models are used to guide implementation of HIV prevention and  
55 treatment interventions, estimate the cost and cost-effectiveness, and explore the potential impact of  
56 new strategies [1-3]. In principle, HIV models incorporate prevention interventions, such as behavioral  
57 changes, medications, or vaccines, based on known mechanisms of action or assumptions about how each  
58 intervention achieves its preventive effect. However, although HIV viral load is the primary predictor of  
59 HIV transmission, [4] few population modeling studies of HIV include a detailed description of the  
60 dynamics of HIV viral load along stages of HIV disease progression [5]. A potential modeling approach is  
61 nesting stochastic algorithms using Markov chain for HIV disease progression (i.e., changes in viral load  
62 and CD4 count over time) into HIV transmission models [6]. These estimates of changes in HIV viral load  
63 and CD4 count are particularly applicable when modeling interventions that exert a preventive effect by  
64 reducing HIV viral load.

65           While universal treatment with antiretroviral therapy (ART) is the most effective strategy for  
66 reducing HIV viral load and onward transmission[7, 8], 72% of HIV-positive people in western and central  
67 Africa and 46% of HIV-positive people in eastern and southern Africa lack access to ART [9], suggesting  
68 that adjunctive strategies to slow disease progression and prevent HIV transmission may be beneficial in  
69 these settings. Suppression of herpes simplex virus type two (HSV-2) in persons co-infected with HIV who  
70 are not yet on ART has been explored as an adjunctive tool for HIV prevention because HIV-HSV-2 co-  
71 infected individuals have faster CD4 count decline, increased HIV viral load and increased risk of onward  
72 transmission of HIV as compared to HIV mono-infected individuals [10, 11]. A previous study of the impact  
73 of HSV-2 suppression on HIV progression in co-infected individuals (the Partners in Prevention HSV/HIV

---

<sup>1</sup> Abbreviations – HSV-2, Herpes simplex virus type two; MSM, men who have sex with men; ART, antiretroviral therapy; VL, viral load; HTC, HIV testing and counseling; QALY, quality adjusted life year; ICER, incremental cost-effectiveness ratio; WHO, World Health Organization

74 Transmission Study) found that acyclovir 400mg, taken twice daily, did not reduce HIV transmission  
75 between HIV serodiscordant heterosexual couples, despite lowering viral load by 0.25 log copies/mL and  
76 reducing the occurrence of HSV-2 positive genital ulcers by 73% [11]. However, administration of twice  
77 daily high-dose (1.5g) valacyclovir, an acyclovir pro-drug, to HIV-HSV-2 co-infected individuals achieved a  
78 76% HIV viral load reduction compared with treatment with acyclovir [12]. This finding raises the  
79 possibility that valacyclovir could also impact HIV progression and transmission differently than acyclovir.  
80 Dynamic transmission modeling allows for estimation of how the additional reduction of HIV viral load  
81 achieved with valacyclovir could impact HIV progression, transmission, and at what programmatic cost.

82 Here, we report on a three step modeling investigation into the impact of co-infection treatment  
83 on HIV disease progression and transmission. First, we calibrate a discrete-time Markov model of HIV  
84 disease progression using data from the Partners in Prevention HSV/HIV Transmission Study [11] and the  
85 Partners PrEP Study [8] to assess CD4 and viral load changes over time in ART-naïve HIV-infected persons.  
86 Then, we validate our disease progression estimates using data on the distribution of CD4 counts and viral  
87 load from a trial of home-based HIV counseling and testing in KwaZulu-Natal, South Africa. Finally, we  
88 combine our disease progression model with a dynamic transmission model to compare strategies of  
89 valacyclovir HSV-2 suppression versus enhanced ART access to reduce onward transmission of HIV.

## 90 **Methods**

### 91 *Study Population:*

92 Data to inform the model of HIV disease progression came from two studies of HIV prevention in  
93 serodiscordant heterosexual partnerships in sub-Saharan Africa—the Partners in Prevention HSV/HIV  
94 Transmission Study [11] and the Partners PrEP Study [8]. Briefly, the Partners HSV/HIV Transmission Study,  
95 a prospective placebo-controlled randomized study, enrolled 3,408 serodiscordant couples from eastern  
96 and southern Africa, in which the HIV-positive partner was ART-naïve and co-infected with HSV-2. The

97 study evaluated the impact of HSV-2 suppression with acyclovir for the HIV-positive partner on HIV  
98 transmission [11]. The Partners PrEP Study, a prospective placebo-controlled randomized study, enrolled  
99 4,758 serodiscordant couples from East Africa in which the HIV-infected partner was ART-naïve. While the  
100 primary objective of Partners PrEP was to evaluate the impact of pre-exposure prophylaxis for HIV-  
101 uninfected partners on HIV acquisition, CD4 and viral load were also measured at six-month intervals for  
102 individuals who acquired HIV infection. Nearly 56% of the HIV-negative partners were seropositive for  
103 HSV-2 at enrollment [8]. We included all CD4 and HIV viral load follow-up data for both studies from  
104 partners who were HIV-negative at enrollment and seroconverted during the study period.

105 *Data:*

106 CD4 count and viral load were measured at the beginning and end of all 6 and 12-month intervals  
107 post-seroconversion and used for this analysis. For intervals that ended with ART initiation, the CD4 count  
108 and VL were estimated by the aggregate distribution of CD4 and viral load measurements  $\leq 3$  months prior  
109 to ART initiation. There were 151 HIV seroconverters in the Partners in Prevention HSV/HIV Transmission  
110 Study and 138 HIV seroconverters in the Partners PrEP Study [8, 11].

111 *Analysis of Disease Progression:*

112 To estimate disease progression among HIV-infected individuals, we organized individuals into  
113 discrete CD4 and viral load categories. The amount of time spent in each CD4 and viral load category was  
114 then estimated by applying discrete-time Markov models for CD4 and viral load, and calculating the time  
115 to absorption (Fig. 1). Only observations with simultaneous CD4 and viral load measurements were  
116 included in the analysis. The proportions of individuals progressing from one CD4 and viral load category  
117 to another were assumed to form the transition matrix for progression from one category to another. For  
118 CD4 cell progression, we calculated the average time from  $CD4 > 500$  cells/ $\mu L$  to absorption in each of the  
119 subsequent CD4 categories. The duration in each category was estimated to be the difference between

120 times to absorption for adjacent absorption scenarios. A similar process was used for viral load  
121 progression, but with starting viral load of <1,000 copies/mL.

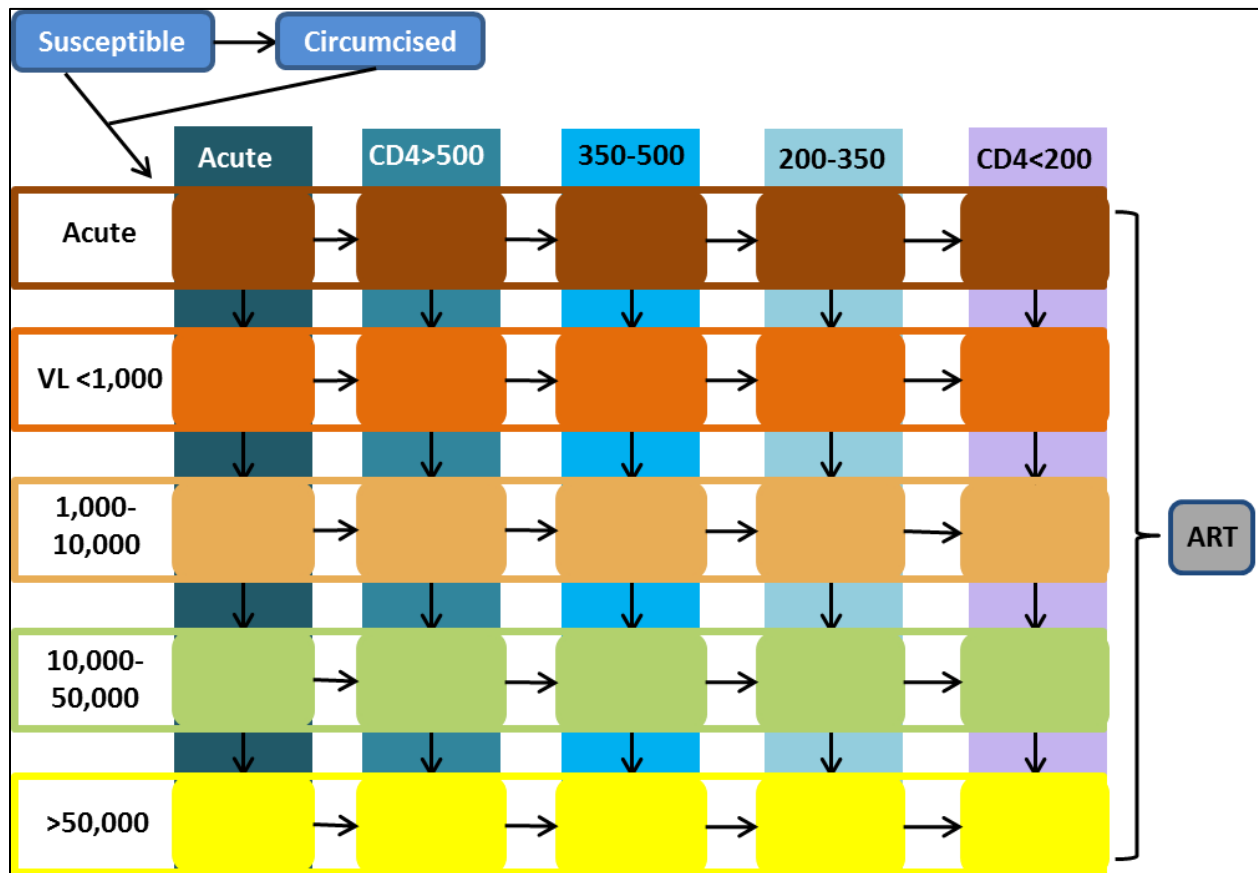

122  
123 **Figure 1. Model transition diagram.** A diagram of the natural history of HIV infection. All movement is in  
124 one direction except for enrollment in and dropout from interventions from ART. Acute infection is  
125 modeled as a transient period immediately following HIV infection with high probability of onward HIV  
126 transmission, and is independent of CD4 count and viral load.  
127

128 *Model Validation:*

129 We validated the disease progression model by comparing the annual cross-sectional distribution  
130 of CD4 counts and HIV viral load during the epidemic between our model and as observed values in  
131 KwaZulu-Natal from a previous study of home-based HIV testing and counseling (HTC) in KwaZulu-Natal,  
132 South Africa [13].

133 **Table 1. Key parameters used in model.** The parameters were based on the HBHCT study and other  
 134 literature. For parameters with varying estimates, we used a value that best fit our model.

| Model Parameter                                                    | Value [Range]                                                       | Reference                                           |
|--------------------------------------------------------------------|---------------------------------------------------------------------|-----------------------------------------------------|
| <b>Transmission Probability<sup>a</sup></b>                        |                                                                     |                                                     |
| Baseline Probability                                               | 0.00053                                                             | Boily <i>et al.</i> , Powers <i>et al.</i> [14, 15] |
| Acute                                                              | 26 x Baseline [0.0082, 0.015]                                       | Hollingsworth <i>et al.</i> [16]                    |
| VL≤1,000 copies/mL                                                 | 1 x Baseline [0.01, 11]                                             | Baeten <i>et al.</i> [17]                           |
| VL 1,000-10,000 copies/mL                                          | 1.1 x Baseline [0.1, 3.8]                                           | Baeten <i>et al.</i> [17]                           |
| VL 10,000-50,000 copies/mL                                         | 3.1 x Baseline [1.3, 4.5]                                           | Baeten <i>et al.</i> [17]                           |
| VL>50,000 copies/mL                                                | 8.7 x Baseline [3.6-11.0]                                           | Baeten <i>et al.</i> [17]                           |
| <b>ART Effectiveness for Reducing HIV Transmission<sup>b</sup></b> | 90% <sup>c</sup>                                                    | Donnell <i>et al.</i> , Cohen <i>et al.</i> [7, 18] |
| <b>Baseline ART Coverage</b>                                       | 36% of all HIV-infected persons                                     | Barnabas <i>et al.</i> [19]                         |
| <b>HSV Prevalence</b>                                              |                                                                     |                                                     |
| Males                                                              | 60%                                                                 | Barnabas <i>et al.</i> [20]                         |
| Females                                                            | 80%                                                                 | Barnabas <i>et al.</i> [20]                         |
| <b>HSV Impact on HIV</b>                                           |                                                                     |                                                     |
| HIV acquisition in males                                           | RR 2.8                                                              | Barnabas <i>et al.</i> [20]                         |
| HIV acquisition in females                                         | RR 3.4                                                              | Barnabas <i>et al.</i> [20]                         |
| Disease progression                                                | 20% <sup>d</sup>                                                    | Lingappa <i>et al.</i> [21]                         |
| <b>Costs</b>                                                       |                                                                     |                                                     |
| HBHCT with Community Care Workers <sup>e</sup>                     | Per HIV-positive person: \$28.06<br>Per HIV-negative person: \$8.22 | Ying <i>et al.</i> [22]                             |
| ART                                                                | \$682 per person per year                                           | CHAI [23]                                           |
| Valacyclovir                                                       | \$571 per person per year                                           | CHAI, personal communication                        |
| Hospitalization: pre-ART CD4≤200 cells/μL                          | \$121 per HIV-infected person per year                              | Meyer-Rath <i>et al.</i> [24]                       |
| Hospitalization: pre-ART CD4 200-350 cells/μL                      | \$58 per HIV-infected person per year                               | Meyer-Rath <i>et al.</i> [24]                       |
| Hospitalization: pre-ART CD4>350 cells/μL                          | \$39 per HIV-infected person per year                               | Meyer-Rath <i>et al.</i> [24]                       |
| Hospitalization: post-ART CD4 200-350 cells/μL                     | \$111 per HIV-infected person per year                              | Meyer-Rath <i>et al.</i> [24]                       |
| Hospitalization: post-ART CD4>350 cells/μL                         | \$45 per HIV-infected person per year                               | Meyer-Rath <i>et al.</i> [24]                       |

135 <sup>a</sup>Probability of HIV transmission per coital act assumes that HIV transmission is a Bernoulli process.

136 <sup>b</sup>Proportion of transmissions from or to a specific demographic averted due to intervention.

137 <sup>c</sup>Value includes 96% reduction in HIV transmission due to ART with 6% annual loss to follow-up.

138 <sup>d</sup>Individuals with HSV co-infection are 20% more likely to progress to the next CD4 stage.

139 <sup>e</sup>Community Care Workers (public-sector salary)

140



141 *HIV transmission model:*

142 We developed a dynamic, compartmental model of HIV transmission at population level in  
143 KwaZulu-Natal in which the disease progression model was embedded. The transmission mathematical  
144 model was parameterized from our observational home-based HTC study, which was conducted in  
145 Vulindlela, KwaZulu-Natal from September 2011 to May 2013 (Table 1). The model is stratified by age,  
146 gender, sexual risk, and HSV-2 status, with HIV-infected persons progressing through CD4 and viral load  
147 categories as defined for the Markov model. An individual's HSV-2 status was HSV-2 uninfected, HSV-2  
148 infected, or HSV-2 suppressed with valacyclovir prophylaxis. At baseline, we assume no valacyclovir  
149 prophylaxis is used and that 60% of HIV infected men are co-infected with HSV-2, and 80% of HIV-infected  
150 women are co-infected with HSV-2 [20]. HSV-2 infection is assumed to increase HIV transmission and HIV  
151 acquisition as estimated in a previous meta-analysis [20] (Table 1). The age-specific HIV incidence and  
152 prevalence were validated with independent South African national survey data [25].

153 *Valacyclovir intervention scenarios:*

154 We assessed the impact of valacyclovir prophylaxis on HIV progression and HIV transmission in  
155 three scenarios (Table 2). The baseline scenario assumes that valacyclovir is not provided, and that  
156 persons become eligible for ART when their CD4 falls below 500. The valacyclovir scenario assumes that  
157 48% of individuals with  $CD4 \leq 500$  cells/ $\mu$ L and not using valacyclovir are on ART, with the initiation of  
158 valacyclovir leading to a 25% increase in ART coverage (60%), due to retention in pre-ART care and more  
159 rapid initiation of ART when an individual's CD4 count falls below 500 cells/ $\mu$ L. The final scenario assumes  
160 a Test and Treat program where 70% of all HIV-positive individuals are on ART, and no one is taking  
161 valacyclovir prophylaxis. All scenarios assume that home-based HTC is a platform for reaching individuals,  
162 which reaches a greater proportion of individuals in a given community than strictly facility-based  
163 programs. We assumed that for HSV-2/HIV co-infected persons, valacyclovir prophylaxis reduces viral load

164 by 1.23 log copies/mL, as observed previously, thus slowing CD4 progression [12]. In the first scenario,  
 165 persons using valacyclovir were assumed to be on valacyclovir for five years, or until ART initiation.

166 **Table 2. Intervention programmatic assumptions.** The scenarios used in model to evaluate home-based  
 167 HTC are based on an observational study of home-based HTC in KwaZulu-Natal from March 2011 to  
 168 March 2013.

| Scenario                          | Drug Coverage by CD4 Category (cells/ $\mu$ L) |            |            |            | Drug         |
|-----------------------------------|------------------------------------------------|------------|------------|------------|--------------|
|                                   | >500 after acute stage                         | 500 to 350 | 350 to 200 | $\leq$ 200 |              |
| <b>Baseline ART<sup>a</sup></b>   | 0%                                             | 20%        | 60%        | 90%        | ART          |
|                                   | 0%                                             | 0%         | 0%         | 0%         | Valacyclovir |
| <b>Valacyclovir<sup>b</sup></b>   | 0%                                             | 60%        | 60%        | 90%        | ART          |
|                                   | 40%                                            | 16%        | 16%        | 4%         | Valacyclovir |
| <b>Test and Treat<sup>c</sup></b> | 70%                                            | 70%        | 70%        | 70%        | ART          |
|                                   | 0%                                             | 0%         | 0%         | 0%         | Valacyclovir |

169 <sup>a</sup>Baseline represents ART coverage with Home HTC.

170 <sup>b</sup>40% of HIV-positive persons not on ART use valacyclovir.

171 <sup>c</sup>Persons are eligible for ART at any disease stage, but only 70% of persons access ART.

172  
 173 Costs for this program were determined by estimates in the literature. The costs of ART and  
 174 valacyclovir (1.5g) were estimated to be \$682 [26] and \$571 per person per year. HBHTC was assumed to  
 175 cost \$28.06 per HIV-positive person tested and \$8.22 per HIV-negative person tested [22]. Finally, the  
 176 costs of care for HIV-positive persons with and without ART were assumed to be as estimated by Meyer-  
 177 Rath and colleagues[24].

## 178 Results

### 179 *Sample Characteristics*

180 The final sample included 5,388 6-month transitions and 10,706 12-month transitions, which were  
 181 drawn from 289 unique individuals. Transitions are overlapping intervals of time that include movement  
 182 of an individual from one CD4 and viral load compartment to another. The median length of follow-up

183 following seroconversion was 15 months (range, 3 to 27 months) for the Partners HSV cohort and 31  
184 months (range, 4 to 56 months) for the Partners PrEP cohort. The age distribution of seroconverters was  
185 similar between the two datasets, with 23% and 20% of individuals being less than 25 years of age in the  
186 Partners HSV and Partners PrEP cohorts, respectively, and 65% and 66% being less than 35 years,  
187 respectively.

188 *Estimated Duration of Disease Stage by CD4 and Viral Load:*

189 The overall durations of each disease stage by CD4 and viral load are shown in Table 3. Excluding  
190 acute infection, the average times spent with CD4 > 500 cells/ $\mu$ L, CD4 350-500 cells/ $\mu$ L, and CD4 200-350  
191 cells/ $\mu$ L are 1.88 years, 1.22 years, and 5.90 years, respectively. The duration of disease after acute  
192 infection and before reaching CD4 200 cells/ $\mu$ L is 2.53 years longer for females than males. After assuming  
193 a three-month duration for acute infection and including estimates for mortality at each stage and for  
194 CD4  $\leq$  200 cells/ $\mu$ L, overall life expectancy is estimated to be 11.58 years for females and 9.23 years for  
195 males.

196 Excluding acute infection, the average times spent with viral load  $\leq$  1,000 copies/mL, 1,000-10,000  
197 copies/mL, and 10,000-50,000 copies/mL are 3.13 years, 1.99 years, and 4.40 years, respectively. The  
198 duration of disease after acute infection and before reaching viral load > 50,000 copies/mL is 2.85 years  
199 longer for females than for males.

200

201 **Table 3. Estimated duration of time in each CD4 (a) and Viral Load (b) category in ART-naïve persons,**  
 202 **by gender.** Estimates are based on average time to absorbing state in Markov model. Life expectancy  
 203 estimate is the summation of time in each stage adjusted for CD4-specific mortality.

| (a) | Gender | Time (years) CD4 Stage |      |            |            |      | Life Expectancy <sup>a</sup> |
|-----|--------|------------------------|------|------------|------------|------|------------------------------|
|     |        | Acute                  | >500 | 500 to 350 | 350 to 200 | ≤200 |                              |
|     | Female | 0.25                   | 1.94 | 1.35       | 6.71       | 1.96 | 11.58                        |
|     | Male   | 0.25                   | 1.71 | 1.05       | 4.71       | 1.96 | 9.23                         |
|     | Both   | 0.25                   | 1.88 | 1.22       | 5.90       | 1.96 | 10.66                        |

204

| (b) | Gender | Time (years) Viral Load Stage |        |                |                 |               | Life Expectancy <sup>a</sup> |
|-----|--------|-------------------------------|--------|----------------|-----------------|---------------|------------------------------|
|     |        | Acute                         | ≤1,000 | 1,000 – 10,000 | 10,000 – 50,000 | >50,000 (est) |                              |
|     | Female | 0.25                          | 3.06   | 2.27           | 5.45            | 1.18          | 11.58                        |
|     | Male   | 0.25                          | 3.44   | 1.45           | 3.04            | 1.50          | 9.23                         |
|     | Both   | 0.25                          | 3.13   | 1.99           | 4.40            | 1.44          | 10.66                        |

205 <sup>a</sup>Life expectancy estimates include mortality based on CD4.

206 *Validation of Disease Progression Estimates:*

207 With the disease progression estimates input as parameters in a mathematical model of  
 208 heterosexual HIV transmission in KwaZulu-Natal, we determined the cross-sectional distribution of CD4  
 209 count and HIV viral load. We estimated that in 2012, the proportion of HIV-positive persons with CD4  
 210 counts <200, 200-350, 350-500, and >500 cells/μL were 12%, 38%, 19%, and 31%, which we found to be  
 211 similar to estimates from KwaZulu-Natal, South Africa, of 11%, 22%, 25%, and 42%. The model also  
 212 estimated the proportion of HIV-positive persons with viral load >50000, 10000-50000, 1000-10000, and  
 213 <1000 copies/mL to be 22%, 23%, 12%, and 38%, which we found to be similar to estimates of 24%, 22%,  
 214 29%, and 25% (Fig. 2).

215

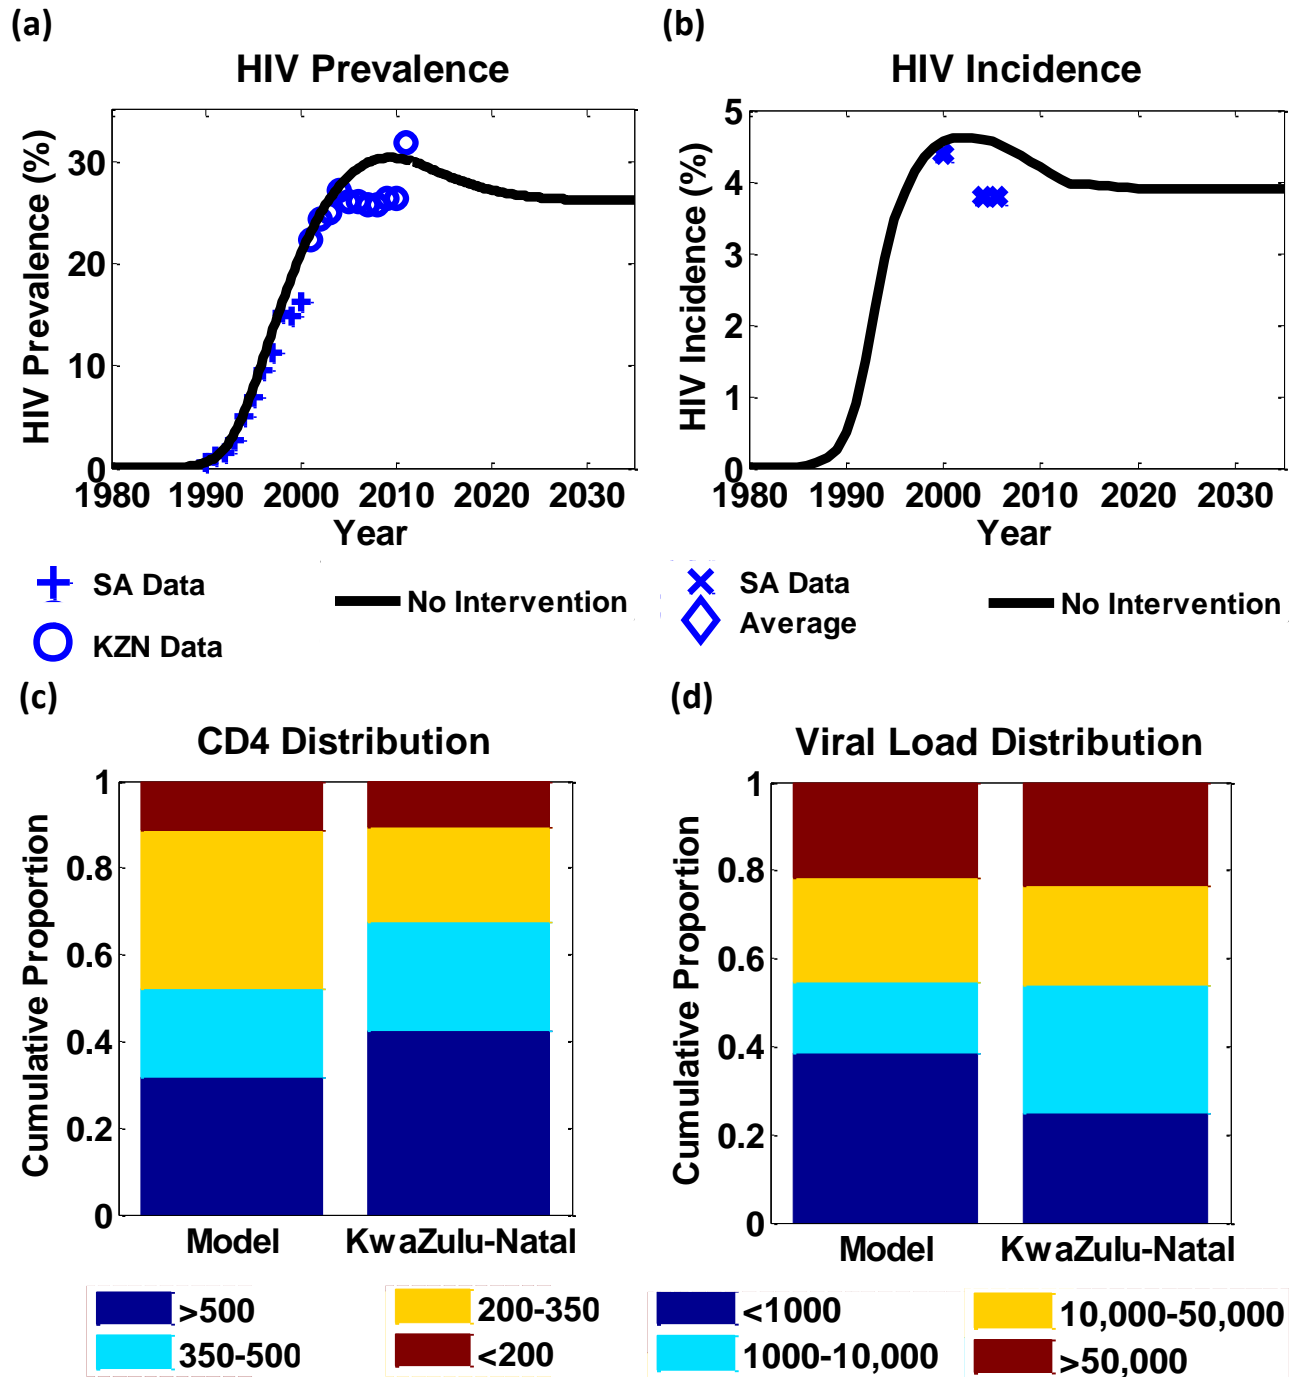

216 **Figure 2. Model output for HIV prevalence and incidence.** Model HIV prevalence (a) is similar to observed  
 217 prevalence in KZN, and model HIV incidence (b) is similar to the average HIV incidence observed in KZN.  
 218 Model output for the distribution of CD4 counts (c) and viral load (d) in HIV positive persons compared to  
 219 the distribution seen in a study of Home HIV Testing and KwaZulu-Natal

220 *Estimated Impact and Cost-Effectiveness of Valacyclovir on HIV Disease Progression and Transmission*

221 Relative to a baseline of community HTC, valacyclovir with increased linkage to care results in  
 222 166,000 fewer HIV infections over ten years, with an incremental cost-effectiveness ratio (ICER) of \$4,696  
 223 per HIV infection averted (Table 4). The Test and Treat scenario of 70% ART coverage and no valacyclovir  
 224 results in 202,000 fewer HIV infections at an ICER of \$6,579, which is less than three times the per capita  
 225 gross domestic product of South Africa and considered cost-effective.

226 Although valacyclovir is expected to prevent infections, it results in a reduction in quality-adjusted  
 227 life-years (QALY) relative to baseline, due to slowing of CD4 decline and thus delaying ART eligibility in  
 228 settings without universal eligibility for ART. The Test and Treat scenario, however, increases QALYs at an  
 229 ICER of \$570 per QALY gained relative to baseline.

230 **Table 4. Effectiveness and cost-effectiveness of expanded ART coverage with and without valacyclovir**  
 231 **prophylaxis.** The baseline scenario assumes that 48% of HIV positive persons are virally suppressed. The  
 232 outcomes reflect 3% annual discounting of health outcomes for a ten-year time horizon.

| Outcome                | Scenario                | Effectiveness | Cost (Millions, 2014 USD) | ICER               |
|------------------------|-------------------------|---------------|---------------------------|--------------------|
| HIV Infections Averted | Baseline: Community HTC | 0             | \$0                       | 0                  |
|                        | Valacyclovir            | 166,000       | \$778                     | \$4,696            |
|                        | Test and Treat          | 202,000       | \$1,017                   | \$6,579            |
| QALYs Gained           | Baseline: Community HTC | 0             | \$0                       | 0                  |
|                        | Valacyclovir            | -200,000      | \$778                     | Strongly Dominated |
|                        | Test and Treat          | 1,783,000     | \$1,017                   | \$570              |

233

234 **Discussion**

235 In this multi-part study, we first estimated HIV disease progression using data from two previous  
 236 clinical trials fit to a discrete-time Markov model. Then, we validated and applied our disease progression  
 237 findings to estimate the impact of valacyclovir prophylaxis taken by HIV-HSV-2 co-infected persons on HIV  
 238 disease progression and transmission in a dynamic transmission model. In estimating disease progression,

239 we found that women progress through the course of HIV disease more slowly than men, resulting in a  
240 longer life expectancy following seroconversion than men. Most of the additional time spent living with  
241 HIV for women is spent in the later stage of HIV infection (CD4 200 to 350 cells/ $\mu$ L and viral load 10,000  
242 to 50,000 copies/mL). Estimating these HIV viral load values allowed us to further estimate the impact of  
243 providing valacyclovir to HIV-HSV-2 co-infected patients on onward transmission of HIV. Using our model  
244 of HIV transmission, we found that valacyclovir prophylaxis was a cost-effective strategy for averting HIV  
245 transmission and subsequent new infections. However, unintuitively the valacyclovir strategy reduced  
246 QALYs due to the slower CD4 decline and delay in ART eligibility among persons who were taking it. A test  
247 and treat scenario of 70% ART coverage without CD4 eligibility criteria was found to be the most cost-  
248 effective strategy.

#### 249 *Disease progression modeling in context*

250 Our modeled estimates of HIV disease progression are similar to those found in observational  
251 studies. In HIV-infected adults in Cote d'Ivoire and Uganda, the median time from seroconversion to  
252 CD4<350 cells/ $\mu$ L was 3.2 years, and from CD4<350 cells/ $\mu$ L to death was 7.6 years, which were similar to  
253 our estimates of 3.35 years and 7.86 years, respectively [27]. Two studies of European cohorts also found  
254 similar estimates. In the CASCADE Collaboration of primarily European individuals, estimates of 3.80 years  
255 from seroconversion to CD4<350 cells/ $\mu$ L and 7.10 years to CD4<200 cells/ $\mu$ L were similar to our estimates  
256 of 3.35 and 9.25 years, respectively [28]. The time from seroconversion to CD4<350 cells/ $\mu$ L was estimated  
257 to be shorter for Dutch MSM who acquired HIV infection in 2003-2007 versus in 1984-1995, with the  
258 estimate for 2003-2007 varying between 2.2 and 3.0 years between three different methods of calculation  
259 [29].

260 Previous observational studies have also found that women have slower disease progression than  
261 men. An analysis of the CASCADE Collaboration found that women have a relative risk of 0.76 of

262 progressing to AIDS and a 0.68 relative risk of progressing to death relative to men [30]. Viral load has also  
263 been estimated to be lower in females than males at all CD4 levels in a cohort of intravenous drug users  
264 in the USA [31], as well as to increase at a slower rate in women than in men in an African cohort [32].  
265 However, other studies have found no difference in CD4 count and progression between men and women  
266 [33]. Differences in results may be due to variable progression by HIV subtype [34, 35] or co-infection  
267 status [20].

### 268 *Valacyclovir prophylaxis in context*

269 Despite prior published estimates of CD4 and viral load progression, few models have  
270 incorporated such estimates of disease progression into their assessments of the impact of valacyclovir  
271 therapy for HIV-HSV-2 co-infected persons. A previous study by Vickerman and colleagues estimated that  
272 acyclovir use in HIV-HSV-2 co-infected women, assuming increased retention in care for women prior to  
273 initiating ART, would cost \$1130 per life-year gained [36], whereas the model used here found that  
274 valacyclovir prophylaxis would worsen health outcomes due to delayed ART initiation. The difference  
275 between our results can be attributed to different model structures. Whereas the model used by  
276 Vickerman and colleagues followed the life-time trajectory for 300 HIV-negative women, the model used  
277 here is population-level and measures outcomes on a ten-year time horizon. Furthermore, Vickerman et  
278 al. modeled the use of acyclovir rather than valacyclovir, with the former having been demonstrated to  
279 be less effective at reducing HIV viral load. Another model investigating the HIV-HSV-2 synergy was  
280 developed by Feng et al., who estimated the contribution of HSV-2 infection to the HIV epidemic, finding  
281 that nearly 10% of all HIV cases can be attributed to HSV-2 infection [37].

### 282 *Strengths and limitations of this study*

283 A primary contribution of this study is developing a novel Markov model of HIV disease  
284 progression through CD4 and VL categories that generates cross-sectional CD4 and viral load prevalences



285 which compare well with observed data. While the estimates were generally similar, the model did  
286 estimate that a larger proportion of the HIV-positive population would fall within the VL<1,000 category,  
287 relative to the observed data from KwaZulu-Natal (38% versus 25%), and a smaller proportion of the  
288 population to fall within the VL 1,000 – 10,000 category (12% versus 29%). This may be due to the  
289 structure of the model, where all individuals entered the VL <1000 category after acute infection.  
290 However, adjusting the modeled population viral load distribution to more closely match the KwaZulu-  
291 Natal data could be expected to further increase the benefit of the universal test and treat scenario, due  
292 to the efficacy of ART in reducing viral load and averting additional HIV transmissions. Additionally,  
293 although the data used to fit the Markov model were limited to recent HIV seroconverters rather than the  
294 general population of HIV positive persons, estimates of disease progression from seroconverters have  
295 been previously extrapolated to the general seroprevalent population [38].

296 Another strength of this analysis is that the datasets used to estimate the disease progression  
297 came from cohorts with high prevalence on HSV-2 seropositivity. These estimates would be generalizable  
298 to the many populations with high rates of HIV-HSV-2 co-infection [20], but may not apply as well to  
299 populations with low prevalence of HSV-2 infection. Finally, a major driver of our cost estimates were  
300 medication. Although our values were rigorously researched estimates, exact costs frequently change,  
301 particularly with costs decreasing in the near future.

### 302 *Future directions*

303 As more national health programs adopt the WHO recommendation for universal ART eligibility,  
304 there will be additional opportunities to use models of disease progression to predict how expansion of  
305 ART in different care models will impact the epidemic. Understanding differences in disease progression  
306 by sex and by co-infection status will be important to include in these estimates. Models that explicitly

307 include disease progression can be used to estimate the impact of therapeutic vaccines which aim to  
308 decrease the progression of HIV.

### 309 **Conclusion**

310 Our finding that universal ART access achieves the greatest QALY gains supports current WHO  
311 goals of extending ART to all HIV-infected persons. Using validated estimates of disease progression in  
312 this model allowed us to estimate the population-level impact of a drug that slows disease progression.  
313 Even when compared with initiation of a safe drug (valacyclovir) that could potentially reduce HIV  
314 transmission in a setting of high HSV-2 prevalence, universal treatment for HIV is the optimal strategy for  
315 increasing QALYs and public health benefit. Universal HIV treatment should be pursued by all countries to  
316 most effectively and efficiently reduce the HIV burden.

### 317 **Acknowledgements**

318 The authors acknowledge funding from the National Institutes of Health (NIH 5 R01 AI083034, 3 R0  
319 AI083034-02S2, NIH Directors Award RC4 AI092552) and the University of Washington Center for AIDS  
320 Research (NIH P30 AI027757).

321

322

323 **References**

- 324 1. Anderson SJ, Cherutich P, Kilonzo N, Cremin I, Fecht D, Kimanga D, Harper M, Masha RL, Ngongo  
325 PB, Maina W *et al*: **Maximising the effect of combination HIV prevention through prioritisation**  
326 **of the people and places in greatest need: a modelling study**. *Lancet* 2014, **384**(9939):249-256.
- 327 2. McGillen JB, Anderson SJ, Dybul MR, Hallett TB: **Optimum resource allocation to reduce HIV**  
328 **incidence across sub-Saharan Africa: a mathematical modelling study**. *Lancet HIV* 2016,  
329 **3**(9):e441-448.
- 330 3. Hallett TB, Menzies NA, Revill P, Keebler D, Borquez A, McRobie E, Eaton JW: **Using modeling to**  
331 **inform international guidelines for antiretroviral treatment**. *AIDS (London, England)* 2014, **28**  
332 **Suppl 1**:S1-4.
- 333 4. Quinn TC, Wawer MJ, Sewankambo N, Serwadda D, Li C, Wabwire-Mangen F, Meehan MO,  
334 Lutalo T, Gray RH: **Viral load and heterosexual transmission of human immunodeficiency virus**  
335 **type 1**. *The New England journal of medicine* 2000, **342**(13):921-929.
- 336 5. Case KK, Ghys PD, Gouws E, Eaton JW, Borquez A, Stover J, Cuchi P, Abu-Raddad LJ, Garnett GP,  
337 Hallett TB: **Understanding the modes of transmission model of new HIV infection and its use in**  
338 **prevention planning**. *Bulletin of the World Health Organization* 2012, **90**(11):831-838a.
- 339 6. Jewell NP, Kalbfleisch JD: **Marker Models in Survival Analysis and Applications to Issues**  
340 **Associated with AIDS**: Birkhauser; 1992.
- 341 7. Cohen MS, Chen YQ, McCauley M, Gamble T, Hosseinipour MC, Kumarasamy N, Hakim JG,  
342 Kumwenda J, Grinsztejn B, Pilotto JH *et al*: **Prevention of HIV-1 infection with early**  
343 **antiretroviral therapy**. *N Engl J Med* 2011, **365**(6):493-505.
- 344 8. Baeten JM, Donnell D, Ndase P, Mugo NR, Campbell JD, Wangisi J, Tappero JW, Bukusi EA,  
345 Cohen CR, Katabira E *et al*: **Antiretroviral prophylaxis for HIV prevention in heterosexual men**  
346 **and women**. *N Engl J Med* 2012, **367**(5):399-410.
- 347 9. UNAIDS: **Fact Sheet 2016**. In. Edited by Communications and Global Advocacy. Geneva,  
348 Switzerland.; 2016.
- 349 10. Barnabas RV, Webb EL, Weiss HA, Wasserheit JN: **The role of coinfections in HIV epidemic**  
350 **trajectory and positive prevention: a systematic review and meta-analysis**. *AIDS* 2011,  
351 **25**(13):1559-1573.
- 352 11. Celum C, Wald A, Lingappa JR, Magaret AS, Wang RS, Mugo N, Mujugira A, Baeten JM, Mullins JI,  
353 Hughes JP *et al*: **Acyclovir and transmission of HIV-1 from persons infected with HIV-1 and**  
354 **HSV-2**. *The New England journal of medicine* 2010, **362**(5):427-439.
- 355 12. Mugwanya K, Baeten JM, Mugo NR, Irungu E, Ngunjiri K, Celum C: **High-dose valacyclovir HSV-2**  
356 **suppression results in greater reduction in plasma HIV-1 levels compared with standard dose**  
357 **acyclovir among HIV-1/HSV-2 coinfecting persons: a randomized, crossover trial**. *The Journal of*  
358 *infectious diseases* 2011, **204**(12):1912-1917.
- 359 13. van Rooyen H, Barnabas RV, Baeten JM, Phakathi Z, Joseph P, Krows M, Hong T, Murnane PM,  
360 Hughes J, Celum C: **High HIV testing uptake and linkage to care in a novel program of home-**  
361 **based HIV counseling and testing with facilitated referral in KwaZulu-Natal, South Africa**.  
362 *Journal of acquired immune deficiency syndromes (1999)* 2013, **64**(1):e1-8.
- 363 14. Boily MC, Baggaley RF, Wang L, Masse B, White RG, Hayes RJ, Alary M: **Heterosexual risk of HIV-**  
364 **1 infection per sexual act: systematic review and meta-analysis of observational studies**.  
365 *Lancet Infect Dis* 2009, **9**(2):118-129.
- 366 15. Powers KA, Poole C, Pettifor AE, Cohen MS: **Rethinking the heterosexual infectivity of HIV-1: a**  
367 **systematic review and meta-analysis**. *Lancet Infect Dis* 2008, **8**(9):553-563.

- 368 16. Hollingsworth TD, Anderson RM, Fraser C: **HIV-1 transmission, by stage of infection.** *J Infect Dis*  
369 2008, **198**(5):687-693.
- 370 17. Baeten JM, Kahle E, Lingappa JR, Coombs RW, Delany-Moretlwe S, Nakku-Joloba E, Mugo NR,  
371 Wald A, Corey L, Donnell D *et al*: **Genital HIV-1 RNA predicts risk of heterosexual HIV-1**  
372 **transmission.** *Sci Transl Med* 2011, **3**(77):77ra29.
- 373 18. Donnell D, Baeten JM, Kiari J, Thomas KK, Stevens W, Cohen CR, McIntyre J, Lingappa JR, Celum  
374 C, Team PiPHHTS: **Heterosexual HIV-1 transmission after initiation of antiretroviral therapy: a**  
375 **prospective cohort analysis.** *Lancet* 2010, **375**(9731):2092-2098.
- 376 19. Barnabas R, Ying R, van Rooyen H, Murnane P, Hughes J, Baeten J, Celum C: **Using HIV viral load**  
377 **suppression to estimate the impact of community-wide home-based HIV counseling and**  
378 **testing and linkage to ART on HIV incidence in South Africa: A mathematical modeling**  
379 **analysis.** In: *What Will it Take to Achieve an AIDS-free World?* San Francisco: Cell-Lancet; 2013.
- 380 20. Barnabas RV, Celum C: **Infectious co-factors in HIV-1 transmission herpes simplex virus type-2**  
381 **and HIV-1: new insights and interventions.** *Curr HIV Res* 2012, **10**(3):228-237.
- 382 21. Lingappa JR, Baeten JM, Wald A, Hughes JP, Thomas KK, Mujugira A, Mugo N, Bukusi EA, Cohen  
383 CR, Katabira E *et al*: **Daily acyclovir for HIV-1 disease progression in people dually infected with**  
384 **HIV-1 and herpes simplex virus type 2: a randomised placebo-controlled trial.** *Lancet* 2010,  
385 **375**(9717):824-833.
- 386 22. Ying R, Sharma M, Celum C, Baeten JM, van Rooyen H, Hughes JP, Garnett G, Barnabas RV:  
387 **Home testing and counselling to reduce HIV incidence in a generalised epidemic setting: a**  
388 **mathematical modelling analysis.** *Lancet HIV* 2016, **3**(6):e275-282.
- 389 23. **Multi-Country Analysis of Treatment Costs for HIV/AIDS (MATCH): Unit costing at 161**  
390 **Representative Facilities in Ethiopia, Malawi, Rwanda, South Africa and Zambia.** In.; 2012.
- 391 24. Meyer-Rath G, Brennan AT, Fox MP, Modisenyane T, Tshabangu N, Mohapi L, Rosen S,  
392 Martinson N: **Rates and cost of hospitalization before and after initiation of antiretroviral**  
393 **therapy in urban and rural settings in South Africa.** *J Acquir Immune Defic Syndr* 2013,  
394 **62**(3):322-328.
- 395 25. Shisana O, Rehle T, Simbayi L, Parker W, Jooste S, van Wyk VP, Mbelle N, van Zyl J: **South African**  
396 **national HIV prevalence, incidence, behavior and communication survey 2008: A turning tide**  
397 **among teenagers?** In. Cape Town, South Africa; 2008.
- 398 26. **Facility-Based Unit Costing for Antiretroviral Treatment in Five Sub-Saharan African Countries.**  
399 In.: The Clinton Health Access Initiative; 2011.
- 400 27. Wandel S, Egger M, Rangsin R, Nelson KE, Costello C, Lewden C, Lutalo T, Ndyababo A, Todd J,  
401 Van der Paal L *et al*: **Duration from seroconversion to eligibility for antiretroviral therapy and**  
402 **from ART eligibility to death in adult HIV-infected patients from low and middle-income**  
403 **countries: collaborative analysis of prospective studies.** *Sex Transm Infect* 2008, **84** Suppl 1:i31-  
404 i36.
- 405 28. Lodi S, Phillips A, Touloumi G, Geskus R, Meyer L, Thiébaud R, Pantazis N, Amo JD, Johnson AM,  
406 Babiker A *et al*: **Time from human immunodeficiency virus seroconversion to reaching CD4+**  
407 **cell count thresholds &lt;200, &lt;350, and &lt;500 Cells/mm<sup>3</sup>: assessment of need following**  
408 **changes in treatment guidelines.** *Clin Infect Dis* 2011, **53**(8):817-825.
- 409 29. Gras L, Geskus RB, Jurriaans S, Bakker M, van Sighem A, Bezemer D, Fraser C, Prins JM, Berkhout  
410 B, de Wolf F *et al*: **Has the rate of CD4 cell count decline before initiation of antiretroviral**  
411 **therapy changed over the course of the Dutch HIV epidemic among MSM?** *PLoS One* 2013,  
412 **8**(5):e64437.
- 413 30. Jarrin I, Geskus R, Bhaskaran K, Prins M, Perez-Hoyos S, Muga R, Hernández-Aguado I, Meyer L,  
414 Porter K, del Amo J *et al*: **Gender differences in HIV progression to AIDS and death in**

- 415 **industrialized countries: slower disease progression following HIV seroconversion in women.**  
416 *Am J Epidemiol* 2008, **168**(5):532-540.
- 417 31. Farzadegan H, Hoover DR, Astemborski J, Lyles CM, Margolick JB, Markham RB, Quinn TC,  
418 Vlahov D: **Sex differences in HIV-1 viral load and progression to AIDS.** *Lancet* 1998,  
419 **352**(9139):1510-1514.
- 420 32. Amornkul PN, Karita E, Kamali A, Rida WN, Sanders EJ, Lakhi S, Price MA, Kilembe W, Cormier E,  
421 Anzala O *et al*: **Disease progression by infecting HIV-1 subtype in a seroconverter cohort in**  
422 **sub-Saharan Africa.** *AIDS* 2013, **27**(17):2775-2786.
- 423 33. Prins M, Robertson JR, Brettle RP, Aguado IH, Broers B, Boufassa F, Goldberg DJ, Zangerle R,  
424 Coutinho RA, van den Hoek A: **Do gender differences in CD4 cell counts matter?** *AIDS* 1999,  
425 **13**(17):2361-2364.
- 426 34. Kiwanuka N, Laeyendecker O, Robb M, Kigozi G, Arroyo M, McCutchan F, Eller LA, Eller M,  
427 Makumbi F, Birx D *et al*: **Effect of human immunodeficiency virus Type 1 (HIV-1) subtype on**  
428 **disease progression in persons from Rakai, Uganda, with incident HIV-1 infection.** *J Infect Dis*  
429 2008, **197**(5):707-713.
- 430 35. Ssemwanga D, Nsubuga RN, Mayanja BN, Lyagoba F, Magambo B, Yirrell D, Van der Paal L,  
431 Grosskurth H, Kaleebu P: **Effect of HIV-1 subtypes on disease progression in rural Uganda: a**  
432 **prospective clinical cohort study.** *PLoS One* 2013, **8**(8):e71768.
- 433 36. Vickerman P, Devine A, Foss AM, Delany-Moretlwe S, Mayaud P, Meyer-Rath G: **The cost-**  
434 **effectiveness of herpes simplex virus-2 suppressive therapy with daily aciclovir for delaying**  
435 **HIV disease progression among HIV-1-infected women in South Africa.** *Sex Transm Dis* 2011,  
436 **38**(5):401-409.
- 437 37. Feng Z, Qiu Z, Sang Z, Lorenzo C, Glasser J: **Modeling the synergy between HSV-2 and HIV and**  
438 **potential impact of HSV-2 therapy.** *Math Biosci* 2013, **245**(2):171-187.
- 439 38. Lodi S, Phillips A, Touloumi G, Pantazis N, Bucher HC, Babiker A, Chêne G, Vanhems P, Porter K,  
440 Collaboration C: **CD4 decline in seroconverter and seroprevalent individuals in the**  
441 **precombination of antiretroviral therapy era.** *AIDS* 2010, **24**(17):2697-2704.

442
